# Supplementary material for: Efficacy of futibatinib, an irreversible fibroblast growth factor receptor inhibitor, in FGFR-altered breast cancer
Source: PubMed Central journal article supplement (PMC10657448; doi:10.1038/s41598-023-46586-y), 2023-11-18

**Efficacy of futibatinib, an irreversible fibroblast growth factor receptor inhibitor,  
in FGFR-altered breast cancer**

Turcin Saridogan, Argun Akcakanat, Ming Zhao, Kurt W. Evans, Erkan Yuca, Stephen Scott, Bryce P. Kirby, Xiaofeng Zheng, Min Jin Ha, Huiqin Chen, Patrick K. S. Ng, Timothy P. DiPeri, Gordon B. Mills, Jordi Rodon Ahnert, Senthil Damodaran, Funda Meric-Bernstam

## Supplementary Information

**Supplementary Table 1.** Genomic alterations identified in breast cancer PDXs by T200 targeted exome sequencing.

**Supplementary Table 2.** Clinical and molecular characteristics of patient and patient-derived xenograft tumors.

**Supplementary Table 3.** Sensitivity of PDX.007CL and MCF10A cells to FGFR inhibitors.

**Supplementary Table 4.** Genes included in the T200 targeted exome sequencing platform.

**Supplementary Figure 1.** FGFR expression across models. **(a)** FGFR1, FGFR2, FGFR3, and FGFR4 gene expression in reads per kilobase million (RPKM) after removal of the batch effect. **(b)** FGFR amplification and expression. Expression in models with FGFR amplification are marked in red.

**Supplementary Figure 2.** Response of patient-derived xenografts (PDXs) to the fibroblast growth factor receptor (FGFR) inhibitor futibatinib. Female mice bearing breast cancer PDXs (n = 5 per group) were treated orally with the vehicle control or futibatinib (15 mg/kg/day). **(a)** Percent increase in tumor volume (TV) from baseline in different models is shown. **(b)** Antitumor activity as demonstrated by TV treatment/control (T/C) ratio.

**Supplementary Figure 3.** H69 cholangiocyte cells were transduced with parenteral, vector, *FGFR2* wild-type (WT), *FGFR2-BICC1* fusion, and *FGFR2* Y375C mutation, and vector control. **(a)** Cell viability was measured by a sulforhodamine B assay. Bars show the mean OD570  $\pm$  the standard errors of the means. **(b)** Cells were cultured for 3 weeks. Cell colonies were stained, and the total colony area was quantitated. The comparisons of the total colony areas of the *FGFR2* WT, *FGFR2-BICC1*, and *FGFR2* Y375C cell lines to the vector control cell line. A t-test was used to compare the vector control with the *FGFR2* constructs. Bars show the mean total colony areas  $\pm$  the standard errors of the means. **(c)** Cells were and treated with a serial dilution of futibatinib for 4 days. Cell viability was assessed with an SRB assay, and the half-maximal inhibitory concentration (IC<sub>50</sub>) values were calculated. Bars show the mean IC<sub>50</sub> values  $\pm$  the standard errors of the means.

**Supplementary Figure 4.** Growth inhibition curves of **(a)** PDX.007CL and **(b)** MCF10A vector control and MCF10A *FGFR2* Y375C cell lines. Cells were seeded in 384-well spheroid plates. Five days later spheroids were confirmed under the microscope, and they were treated with serial dilutions of AZD4547, dovitinib, erdafitinib, futibatinib, infigratinib, lucitanib, or pemigatinib in quadruplicates. Five days later cell viability was measured using a luminescence-based assay (CellTiter Glo 3D, Promega Corporation).

**Supplementary Figure 5.** The uncropped blot images of Figure 3e.

**Supplementary Table 1. Genomic alterations identified in breast cancer PDXs by T200 targeted exome sequencing.**

| Model   | Alterations                                                                                                                                                                                                     | Whole Exome Platform |
|---------|-----------------------------------------------------------------------------------------------------------------------------------------------------------------------------------------------------------------|----------------------|
| BCX.006 | PIK3CA_H1047R, RET_H.AMP, FGFR4_H.AMP, NOTCH2_H.AMP, FLT3_H.DEL, FLT1_H.DEL, BRCA2_H.DEL, RB1_H.DEL                                                                                                             | T200                 |
| BCX.009 | AKT1_H.AMP, AKT2_H.AMP, CCNE1_H.AMP, PIK3R1_H.DEL                                                                                                                                                               | T200                 |
| BCX.010 | PIK3CA_H1047R, MET_V486A, EGFR_D1072E, FGFR1_V273M, AR_LQQQQ57-61L, AR_Q61L,                                                                                                                                    | T200                 |
| BCX.011 | PTEN_N276S, AKT1_E464K, MAP2K4_V301F, AR_LQQ57-59L, FGFR1_H.AMP, NOTCH4_H.AMP, ATM_H.DEL, DDR1_H.AMP, AKT1_H.AMP, ESR1_H.DEL                                                                                    | T200                 |
| BCX.017 | PIK3CA_H.AMP, CCNE1_H.AMP, PIK3R1_H.DEL                                                                                                                                                                         | T200                 |
| BCX.022 | FGFR1_H.AMP, TOP2A_H.DEL, MLH1_H.DEL, ATM_H.DEL, CDKN2A_H.DEL, JAK2_H.DEL                                                                                                                                       | T200                 |
| BCX.024 | PTEN_H.DEL, RAD51_H.Del                                                                                                                                                                                         | T200                 |
| BCX.042 | NRAS_Q61R, BRCA2_H.DEL, RB1_H.Del, NOTHC2_H.AMP                                                                                                                                                                 | T200                 |
| BCX.051 | PDGFRB_G607D, KIT_H.AMP, KDR_H.AMP, PDGFRA_H.AMP, NOTCH3_H.AMP, FGFR3_H.DEL, MAP3K1_H.DEL, PIK3R1_H.DEL, CSF1R_H.DEL, PDGFRB_H.DEL, NPM1_H.DEL, FGFR4_H.DEL, FLT4_H.DEL, STK11_H.DEL, GNA11_H.DEL, MAP2K2_H.DEL | T200                 |
| BCX.055 | PTEN_H.DEL, RB1_H.DEL, MAPK3K1_H.DEL                                                                                                                                                                            | T200                 |
| BCX.060 | PIK3R1_H.DEL, CDKN2C_H.DEL, BRCA1 (germline)                                                                                                                                                                    | T200                 |
| BCX.066 | FGFR2_H.AMP, NOTCH2_H.AMP, ABL2_H.AMP, NRAS_H.DEL, AR_H.DEL, STAG2_H.DEL, ARAF_H.DEL, AKT1_H.DEL                                                                                                                | T200                 |
| BCX.070 | CCNE1_H.AMP, AKT2_H.AMP, NOTCH1_K2156*, ATM DEL, BRCA2_H.DEL, STK11_H.DEL                                                                                                                                       | T200                 |
| BCX.080 | FLT1_Q52*, BRCA2_R448C, BRCA2_H.DEL, NOTCH2_H.AMP, CCND2_H.AMP, PDCD1_H.DEL, RB1_H.DEL, NPM1_H.DEL, FGFR4_H.DEL, FLT4_H.DEL, CDKN2A_H.DEL, FLT1_H.DEL, FLT3_H.DEL                                               | T200                 |
| BCX.087 | MAPK3K4_H.DEL                                                                                                                                                                                                   | T200                 |

|         |                                                                                                        |      |
|---------|--------------------------------------------------------------------------------------------------------|------|
| BCX.092 | KRAS_H.AMP, CCND3_H.AMP                                                                                | T200 |
| BCX.094 | STK11_H.DEL, BRCA2_H.DEL, CCNE1 H.AMP                                                                  | T200 |
| BCX.095 | RAF1_H.AMP, AR_H.AMP, STAG2_H.AMP,<br>KRAS_H.AMP, BCL2_H.AMP                                           | T200 |
| BCX.096 | FGFR2_H.AMP, NOTCH2_H.AMP, ABL2_H.AMP,<br>NRAS_H.DEL, AR_H.DEL, STAG2_H.DEL,<br>ARAF_H.DEL, AKT1_H.DEL | T200 |
| BCX.099 | CDKN2A_H.DEL, CDKN2A_H.DEL, NOTCH2<br>_H.AMP                                                           | T200 |
| BCX.100 | PTEN_H.DEL                                                                                             | T200 |
| BCX.102 | CCND1_H.AMP, RET H.AMP                                                                                 | T200 |

Supplementary Table 2: Clinical and molecular characteristics of patient and patient-derived xenograft tumors

| Model   | Patient          |        |      | Patient-derived xenograft |        |      |                                                                                                                                                                                                                 | Prior lines of therapy |                                                                                                                         |
|---------|------------------|--------|------|---------------------------|--------|------|-----------------------------------------------------------------------------------------------------------------------------------------------------------------------------------------------------------------|------------------------|-------------------------------------------------------------------------------------------------------------------------|
|         | Biomarker status |        |      | Biomarker status          |        |      | Genomics                                                                                                                                                                                                        |                        |                                                                                                                         |
|         | ER (%)           | PR (%) | HER2 | ER (%)                    | PR (%) | HER2 | Alterations                                                                                                                                                                                                     |                        | Platform                                                                                                                |
| BCX.006 | 0                | 0      | 0    | <1                        | 0      | 0    | PIK3CA_H1047R, RET_H.AMP, FGFR4_H.AMP, NOTCH2_H.AMP, FLT3_H.DEL, FLT1_H.DEL, BRCA2_H.DEL, RB1_H.DEL                                                                                                             | T200                   | Paclitaxel/FEC<br>Capecitabine/Ixabepilone                                                                              |
| BCX.010 | 0                | <1     | 0    | 0                         | 40     | 0    | PIK3CA_H1047R, MET_V486A, EGFR_D1072E, FGFR1_V273M, AR_LQQQQ57-61L, AR_Q61L,                                                                                                                                    | T200                   | TAC<br>Capecitabine                                                                                                     |
| BCX.011 | 0                | 0      | 0    | 0                         | <1     | 0    | PTEN_N276S, AKT1_E464K, MAP2K4_V301F, AR_LQQ57-59L, FGFR1_H.AMP, NOTCH4_H.AMP, ATM_H.DEL, DDR1_H.AMP, AKT1_H.AMP, ESR1_H.DEL                                                                                    | T200                   | Paclitaxel/FEC                                                                                                          |
| BCX.022 | 3                | 0      | 0    | <1                        | 0      | 0    | FGFR1_H.AMP, TOP2A_H.DEL, MLH1_H.DEL, ATM_H.DEL, CDKN2A_H.DEL, JAK2_H.DEL                                                                                                                                       | T200                   | Paclitaxel                                                                                                              |
| BCX.051 | 0                | 0      | 0    | 0                         | 0      | 0    | PDGFRB_G607D, KIT_H.AMP, KDR_H.AMP, PDGFRA_H.AMP, NOTCH3_H.AMP, FGFR3_H.DEL, MAP3K1_H.DEL, PIK3R1_H.DEL, CSF1R_H.DEL, PDGFRB_H.DEL, NPM1_H.DEL, FGFR4_H.DEL, FLT4_H.DEL, STK11_H.DEL, GNA11_H.DEL, MAP2K2_H.DEL | T200                   | Tamoxifen<br>Paclitaxel<br>CMF                                                                                          |
| BCX.066 | 1                | 0      | 0    | 7                         | 40     | 0    | FGFR2_H.AMP, NOTCH2_H.AMP, ABL2_H.AMP, NRAS_H.DEL, AR_H.DEL, STAG2_H.DEL, ARAF_H.DEL, AKT1_H.DEL                                                                                                                | T200                   | Taxol<br>FEC<br>Tamoxifen                                                                                               |
| BCX.080 | 0                | 0      | 0    | 2                         | <1     | 1    | FLT1_Q52*, BRCA2_R448C, BRCA2_H.DEL, NOTCH2_H.AMP, CCND2_H.AMP, PDCD1_H.DEL, RB1_H.DEL, NPM1_H.DEL, FGFR4_H.DEL, FLT4_H.DEL, CDKN2A_H.DEL, FLT1_H.DEL, FLT3_H.DEL                                               | T200                   | Carboplatin/Paclitaxel<br>FEC<br>Carboplatin/Paclitaxel<br>FEC                                                          |
| BCX.095 | <1               | 0      | 0    | 8                         | 0      | 0    | RAF1_H.AMP, AR_H.AMP, STAG2_H.AMP, KRAS_H.AMP, BCL2_H.AMP                                                                                                                                                       | T200                   | Taxol<br>FAC<br>Gemcitabine/Carboplatin                                                                                 |
| PDX.007 | 0                | 0      | 0    | 0                         | 0      | 0    | FGFR2_Y375C, FGFR2_H.AMP, AKT_L179Q, PALB2_G866V, PALB2_H.AMP, BRIP1_R173C, PDGFRB_P345S, EZH2_I55M,                                                                                                            | WES                    | Paclitaxel<br>Doxorubicin/Cyclophosphamide<br>Carboplatin/Gemcitabine<br>Ixabepilone/Capecitabine<br>Ibrutinib/MEDI4736 |

**Supplementary Table 3a. PDX.007CL**

| Drugs        | C <sub>max</sub> (nM) | Test range (nM) | IC <sub>50</sub> (nM) |
|--------------|-----------------------|-----------------|-----------------------|
| Futibatinib  | 344 [1]               | 1 - 10000       | 113                   |
| AZD4547      | -                     | 0.25 - 2500     | 279                   |
| Dovitinib    | 591 [2]               | 0.25 - 2500     | 2500                  |
| Erdafitinib  | 3130 [3]              | 0.25 - 2500     | 179                   |
| Infigratinib | 504 [4]               | 2 - 20000       | 2500                  |
| Lucitanib    | 492 [5]               | 2 - 20000       | 2500                  |
| Pemigatinib  | 236 [6]               | 0.1 - 1000      | 44                    |

**Supplementary Table 3b. MCF-10A constructs**

| Drugs        | C <sub>max</sub> (nM) | Test range (nM) | IC <sub>50</sub> (nM) |          |             |             |
|--------------|-----------------------|-----------------|-----------------------|----------|-------------|-------------|
|              |                       |                 | Vector                | FGFR2 WT | FGFR2-BICC1 | FGFR2 Y375C |
| Futibatinib  | 344 [1]               | 0.07 - 50000    | 22602                 | 259      | 21          | 22          |
| AZD4547      | -                     | 0.07 - 50000    | 971                   | 178      | 5.7         | 16          |
| Dovitinib    | 591 [2]               | 0.5 - 50000     | 169                   | 186      | 207         | 57          |
| Erdafitinib  | 3130 [3]              | 0.07 - 50000    | 21724                 | 1377     | 2.7         | 131         |
| Infigratinib | 504 [4]               | 1 - 100000      | >50000                | 30033    | 3760        | 4013        |
| Lucitanib    | 492 [5]               | 0.1 - 100000    | >50000                | 621      | 1334        | 549         |
| Pemigatinib  | 236 [6]               | 0.01 - 10000    | 2582                  | 34       | 0.9         | 5.9         |

**References**

[1] FDA prescribing information

([https://www.accessdata.fda.gov/drugsatfda\\_docs/label/2022/214801s000lbl.pdf](https://www.accessdata.fda.gov/drugsatfda_docs/label/2022/214801s000lbl.pdf))

[2] Kang YK, Yoo C, Ryoo BY, Lee JJ, Tan E, Park I, Park JH, Choi YJ, Jo J, Ryu JS, Ryu MH. Phase II study of dovitinib in patients with metastatic and/or unresectable gastrointestinal stromal tumours after failure of imatinib and sunitinib. *Br J Cancer*. 2013 Oct 29;109(9):2309-15. doi: 10.1038/bjc.2013.594. Epub 2013 Oct 1. PMID: 24084771; PMCID: PMC3817332.

[3] FDA prescribing information

([https://www.accessdata.fda.gov/drugsatfda\\_docs/label/2019/212018s000lbl.pdf](https://www.accessdata.fda.gov/drugsatfda_docs/label/2019/212018s000lbl.pdf))

[4] FDA prescribing information

([https://www.accessdata.fda.gov/drugsatfda\\_docs/label/2021/214622s000lbl.pdf](https://www.accessdata.fda.gov/drugsatfda_docs/label/2021/214622s000lbl.pdf))

[5] Zhang Y, Luo F, Ma YX, Liu QW, Yang YP, Fang WF, Huang Y, Zhou T, Li J, Pan HM, Yang L, Qin SK, Zhao HY, Zhang L. A Phase Ib Study of Lucitanib (AL3810) in a Cohort of Patients with Recurrent and

Metastatic Nasopharyngeal Carcinoma. *Oncologist*. 2022 Jun 8;27(6):e453-e462. doi: 10.1093/oncolo/oyab076. PMID: 35445718; PMCID: PMC9177108.

[6] FDA prescribing information

([https://www.accessdata.fda.gov/drugsatfda\\_docs/label/2020/213736s000lbl.pdf](https://www.accessdata.fda.gov/drugsatfda_docs/label/2020/213736s000lbl.pdf))



Supplementary Table 4. List of genes included in the T200 targeted exome sequencing platform.

| Symbol   | Chromosome region            | Name                                                                        |
|----------|------------------------------|-----------------------------------------------------------------------------|
| ABL1     | chr9:133,710,831-133,763,060 | c-abl oncogene 1, non-receptor tyrosine kinase                              |
| ACVR1B   | chr12:52345486-52390859      | activin A receptor, type IB                                                 |
| ADAMTS12 | chr5:33,527,287-33,892,124   | ADAM metalloproteinase with thrombospondin type 1 motif, 12                 |
| AKAP3    | chr12:4,724,677-4,754,358    | A kinase (PRKA) anchor protein 3                                            |
| AKT1     | chr14:105235689-105262080    | v-akt murine thymoma viral oncogene homolog 1                               |
| ALK      | chr2:29415641-30144432       | anaplastic lymphoma kinase (Ki-1)                                           |
| APC      | chr5:112073556-112181935     | adenomatous polyposis of the colon gene                                     |
| AR       | chrX:66763874-66944119       | androgen receptor                                                           |
| ARAF     | chrX:47420578-47431319       | v-raf murine sarcoma 3611 viral oncogene homolog                            |
| ARID1A   | chr1:27022522-27108601       | AT rich interactive domain 1A (SWI-like)                                    |
| ASXL1    | chr20:30946153-31027121      | additional sex combs like 1                                                 |
| ATM      | chr11:108093559-108239826    | ataxia telangiectasia mutated                                               |
| ATR      | chr3:142168078-142297668     | ataxia telangiectasia and Rad3 related                                      |
| ATRX     | chrX:76760359-77041719       | alpha thalassemia/mental retardation syndrome X-linked                      |
| AURKA    | chr20:54944445-54967351      | aurora kinase A                                                             |
| AURKB    | chr17:8108050-8113883        | aurora kinase B                                                             |
| BAI3     | chr6:69345632-70099402       | brain-specific angiogenesis inhibitor 3                                     |
| BAP1     | chr3:52435027-52444009       | BRCA1 associated protein-1 (ubiquitin carboxy-terminal hydrolase)           |
| BRAF     | chr7:140433815-140624564     | v-raf murine sarcoma viral oncogene homolog B1                              |
| BRCA1    | chr17:41196313-41277500      | familial breast/ovarian cancer gene 1                                       |
| BRCA2    | chr13:32889617-32973809      | familial breast/ovarian cancer gene 2                                       |
| CARD11   | chr7:2945769-3083579         | caspase recruitment domain family, member 11                                |
| CASP8    | chr2:202122754-202152434     | caspase 8, apoptosis-related cysteine peptidase                             |
| CBL      | chr11:119076990-119178858    | Cas-Br-M (murine) ecotropic retroviral transforming sequence                |
| CD19     | chr16:28943260-28950661      | CD19 molecule                                                               |
| CDH1     | chr16:68771195-68869444      | cadherin 1, type 1, E-cadherin (epithelial) (ECAD)                          |
| CDH10    | chr5:24487210-24644911       | cadherin 10, type 2                                                         |
| CDH11    | chr16:64980685-65155919      | cyclin-dependent kinase 11                                                  |
| CDK4     | chr12:58142005-58146164      | cyclin-dependent kinase 4                                                   |
| CDK6     | chr7:92234237-92465941       | cyclin-dependent kinase 6                                                   |
| CDKN2A   | chr9:21967752-21994490       | cyclin-dependent kinase inhibitor 2A (p16(INK4a)) gene                      |
| CEBPA    | chr19:33790842-33793430      | CCAAT/enhancer binding protein (C/EBP), alpha                               |
| CHEK1    | chr11:125496312-125525639    | CHK1 checkpoint homolog (S. pombe)                                          |
| CHEK2    | chr22:29083731-29137822      | CHK2 checkpoint homolog                                                     |
| COL14A1  | chr8:121137352-121384266     | collagen, type XIV, alpha 1                                                 |
| CPAMD8   | chr19:17003763-17137625      | C3 and PZP-like, alpha-2-macroglobulin domain containing 8                  |
| CREBBP   | chr16:3775058-3930121        | CREB binding protein (CBP)                                                  |
| CRIPAK   | chr4:1385340-1389782         | cysteine-rich PAK1 inhibitor                                                |
| CSF1R    | chr5:149432855-149492935     | colony stimulating factor 1 receptor                                        |
| CSMD1    | chr8:2792876-4852328         | CUB and Sushi multiple domain 1                                             |
| CSMD2    | chr1:33979609-34630875       | CUB and Sushi multiple domains 2                                            |
| CSMD3    | chr8:113235161-114449242     | CUB and Sushi multiple domain 3                                             |
| CTNNB1   | chr3:41240942-41281939       | catenin (cadherin-associated protein), beta 1                               |
| CYLD     | chr16:50775961-50835846      | familial cylindromatosis gene                                               |
| CYP2C19  | chr10:96522463-96612670      | cytochrome P450, family 2, subfamily C, polypeptide 19                      |
| DAXX     | chr6:33,286,336-33,290,793   | death-domain associated protein                                             |
| DDR1     | chr6:30856465-30867931       | discoidin domain receptor tyrosine kinase 1                                 |
| DDR2     | chr1:162602228-162750237     | discoidin domain receptor tyrosine kinase 2                                 |
| DNMT3A   | chr2:25455846-25564774       | DNA (cytosine-5-)-methyltransferase 3 alpha                                 |
| EGFR     | chr7:55086725-55275030       | epidermal growth factor receptor                                            |
| ELN      | chr7:73442427-73484234       | elastin                                                                     |
| EML4     | chr2:42,396,490-42,559,686   | echinoderm microtubule associated protein like 4                            |
| EP300    | chr22:41488614-41576080      | 300 kd E1A-Binding protein gene                                             |
| EPHA3    | chr3:89156674-89531282       | EPH receptor A3                                                             |
| ERBB2    | chr17:37856254-37884914      | v-erb-b2 erythroblastic leukemia viral oncogene homolog 2                   |
| ERBB3    | chr12:56,473,892-56,497,127  | v-erb-b2 erythroblastic leukemia viral oncogene homolog 3 (avian)           |
| ERCC3    | chr2:128014866-128051752     | excision repair cross-complementing rodent repair deficiency, compl group 3 |
| ERCC4    | chr16:14014014-14046205      | excision repair cross-complementing rodent repair deficiency, compl group 4 |
| ERCC5    | chr13:103459496-103524748    | excision repair cross-complementing rodent repair deficiency, comp group 6  |

|          |                              |                                                                                 |
|----------|------------------------------|---------------------------------------------------------------------------------|
| ESR1     | chr6:152163859-152424408     | estrogen Receptor 1                                                             |
| ETV5     | chr3:185764108-185826901     | ets variant 5                                                                   |
| EZH2     | chr7:148504475-148581414     | cer of zeste homolog 2 (Drosophila)                                             |
| FAM123B  | chrX:63404998-63425624       | family with sequence similarity 123B (FAM123B)                                  |
| FAM135B  | chr8:139142268-139509065     | family with sequence similarity 135, member B                                   |
| FAT3     | chr11:92,085,262-92,629,633  | fat tumor suppressor 3                                                          |
| FBXW7    | chr4:153242411-153456185     | F-box and WD-40 domain protein 7 (archipelago homolog, Drosophila)              |
| FGFR1    | chr8:38268657-38326352       | FGFR1 oncogene partner (FOP)                                                    |
| FGFR2    | chr10:123237845-123357972    | fibroblast growth factor receptor 2                                             |
| FGFR3    | chr4:1795039-1810599         | fibroblast growth factor receptor 3                                             |
| FGFR4    | chr5:176513921-176525124     | fibroblast growth factor receptor 4                                             |
| FLG      | chr1:152274651-152297679     | filaggrin                                                                       |
| FLT1     | chr13:28874483-29069265      | fms-related tyrosine kinase 1 (VEGF/vascular permeability factor receptor)      |
| FLT3     | chr13:28577412-28674729      | fms-related tyrosine kinase 3                                                   |
| FLT4     | chr5:180028507-180076624     | fms-related tyrosine kinase 4                                                   |
| FOXL2    | chr3:138,663,067-138,665,982 | forkhead box L2                                                                 |
| GABRA6   | chr5:161112658-161129598     | GABA A receptor, alpha 6                                                        |
| GABRB3   | chr15:26788695-27018251      | GABA A1 receptor, beta 3                                                        |
| GATA1    | chrX:48,644,982-48,652,715   | GATA binding protein 3                                                          |
| GATA3    | chr10:8096667-8117162        | guanine monphosphate synthetase                                                 |
| GNA11    | chr19:3094408-3121452        | guanine nucleotide binding protein (G protein), alpha 11 (Gq class)             |
| GNAQ     | chr9:80335200-80646192       | guanine nucleotide binding protein (G protein), q polypeptide                   |
| GNAS     | chr20:57414795-57486249      | guanine nucleotide binding protein (G protein), alpha stimulating activ polyp 1 |
| HDAC9    | chr7:18535885-19036984       | histone deacetylase 9                                                           |
| HEATR7B2 | chr5:40998123-41071444       | HEAT repeat family member 7B2                                                   |
| HGF      | chr7:81331445-81399452       | hepatocyte growth factor                                                        |
| HMCN1    | chr1:185703683-186160085     | hemicentin 1                                                                    |
| HNF1A    | chr12:121416549-121440312    | transcription factor 1, hepatic (HNF1)                                          |
| HNF1B    | chr17:36046435-36105096      | HNF1 homeobox B                                                                 |
| HRAS     | chr11:532243-535550          | v-Ha-ras Harvey rat sarcoma viral oncogene homolog                              |
| HYDIN    | chr16:70841290-71264569      | hydrocephalus inducing homolog                                                  |
| IDH1     | chr2:209100954-209119806     | isocitrate dehydrogenase 1 (NADP+), soluble                                     |
| IDH2     | chr15:90627214-90645708      | isocitrate dehydrogenase 2 (NADP+), soluble                                     |
| IGF1R    | chr15:99192761-99507758      | insulin-like growth factor 1 receptor                                           |
| IKZF1    | chr7:50344378-50472796       | interleukin 21 receptor                                                         |
| IL6R     | chr1:154377669-154440188     | interleukin 6 receptor                                                          |
| IRS1     | chr2:227596034-227663506     | insulin receptor substrate 1                                                    |
| ITGA4    | chr2:182321619-182402466     | integrin alpha 4 (antigen CD49D subunit of VLA-4 receptor)                      |
| JAK1     | chr1:65298906-65432187       | Janus kinase 1                                                                  |
| JAK2     | chr9:4985245-5128182         | Janus kinase 3                                                                  |
| JAK3     | chr19:17935595-17958841      | Janus kinase 3                                                                  |
| KCNB2    | chr8:73449626-73850582       | potassium voltage-gated channel, Shab-related subfamily, member 2               |
| KDM6A    | chrX:44732423-44971843       | vascular endothelial growth factor receptor 2                                   |
| KDR      | chr4:55944427-55991762       | vascular endothelial growth factor receptor 2                                   |
| KIT      | chr4:55524095-55606879       | kallikrein-related peptidase 2                                                  |
| KRAS     | chr12:25358180-25403854      | v-Ki-ras2 Kirsten rat sarcoma 2 viral oncogene homolog                          |
| LAMA1    | chr18:6941888-7117813        | laminin, alpha 1                                                                |
| LPHN3    | chr4:62362839-62938167       | latrophilin 3                                                                   |
| LRP1     | chr12:57,522,282-57,607,123  | low density lipoprotein receptor-related protein 1B                             |
| LRP1B    | chr2:140988996-142889270     | low density lipoprotein receptor-related protein 2                              |
| LRP2     | chr2:169983620-170219122     | low density lipoprotein receptor-related protein 3                              |
| MAP2K1   | chr15:66679211-66783881      | mitogen-activated protein kinase kinase 1                                       |
| MAP2K4   | chr17:11924135-12047050      | mitogen-activated protein kinase kinase 4                                       |
| MAP3K1   | chr5:56110900-56191976       | mitogen-activated protein kinase kinase kinase 1                                |
| MAP3K4   | chr6:161412822-161538416     | mitogen-activated protein kinase kinase kinase 4                                |
| MDN1     | chr6:90353231-90529442       | MDN1, midasin homolog                                                           |
| MECOM    | chr3:168801287-169381563     | MDS1 and EVI1 complex locus                                                     |
| MEN1     | chr11:64570996-64578188      | multiple endocrine neoplasia type 1 gene                                        |
| MET      | chr7:116312459-116438439     | met proto-oncogene (hepatocyte growth factor receptor)                          |
| MITF     | chr3:69788633-70017486       | microphthalmia-associated transcription factor                                  |
| MLH1     | chr3:37034979-37092335       | E.coli MutL homolog gene                                                        |
| MLL2     | chr12:49412762-49449107      | myeloid/lymphoid or mixed-lineage leukemia 2                                    |
| MLL3     | chr7:151832012-152133090     | myeloid/lymphoid or mixed-lineage leukemia 3                                    |
| MPL      | chr1:43803475-43820134       | myeloproliferative leukemia virus oncogene                                      |
| MSH2     | chr2:47630263-47710360       | mutS homolog 2 (E. coli)                                                        |

|         |                             |                                                                              |
|---------|-----------------------------|------------------------------------------------------------------------------|
| MSH6    | chr2:48,010,221-48,034,084  | mutS homolog 6 (E. coli)                                                     |
| MTOR    | chr1:11166589-11322608      | mammalian target of rapamycin complex 1                                      |
| MYD88   | chr3:38179969-38184510      | myeloid differentiation primary response gene (88)                           |
| NAV3    | chr12:78225069-78606788     | neuron navigator 3                                                           |
| NCOR1   | chr17:15935259-16118845     | nuclear receptor corepressor 1                                               |
| NF1     | chr17:29,421,995-29,704,694 | neurofibromatosis type 1 gene                                                |
| NF2     | chr22:29999545-30094583     | neurofibromatosis type 2 gene                                                |
| NFKB2   | chr10:104154339-104162280   | nuclear factor of kappa light polypeptide gene enhancer in B-cells 2         |
| NOTCH1  | chr9:139388897-139440238    | Notch homolog 1, translocation-associated (Drosophila) (TAN1)                |
| NOTCH2  | chr1:120454178-120612276    | Notch homolog 2                                                              |
| NOTCH3  | chr19:15270445-15311792     | notch 3                                                                      |
| NOTCH4  | chr6:32162621-32191844      | notch4                                                                       |
| NPM1    | chr5:170814798-170837887    | nucleophosmin (nucleolar phosphoprotein B23, numatrin)                       |
| NRAS    | chr1:115247079-115259515    | neuroblastoma RAS viral (v-ras) oncogene homolog                             |
| NSD1    | chr5:176560833-176727213    | nuclear receptor binding SET domain protein 1                                |
| PALB2   | chr16:23614483-23652678     | partner and localizer of BRCA2                                               |
| PAPPA2  | chr1:176432307-176811968    | pappalysin 2                                                                 |
| PAX5    | chr9:36838531-37034476      | paired box gene 5 (B-cell lineage specific activator protein)                |
| PBRM1   | chr3:52,579,368-52,713,739  | polybromo 1                                                                  |
| PCDH15  | chr10:55580860-56561051     | protocadherin 1                                                              |
| PCLO    | chr7:82383321-82792197      | piccolo (presynaptic cytomatrix protein)                                     |
| PDGFRA  | chr4:55095264-55164411      | platelet-derived growth factor, alpha-receptor                               |
| PDGFRB  | chr5:149493403-149535422    | platelet-derived growth factor receptor, beta polypeptide                    |
| PIK3CA  | chr3:178866311-178952495    | phosphoinositide-3-kinase, catalytic, alpha polypeptide                      |
| PIK3CG  | chr7:106505924-106547585    | phosphoinositide-3-kinase, catalytic, gamma polypeptide                      |
| PIK3R1  | chr5:67522118-67597647      | phosphoinositide-3-kinase, regulatory subunit 1 (alpha)                      |
| PIKFYVE | chr2:209130991-209223474    | protein phosphatase 2A activator, regulatory subunit 4                       |
| PKHD1   | chr6:51480145-51952423      | polycystic kidney and hepatic disease 1 (autosomal recessive)                |
| PKHD1L1 | chr8:110374706-110543499    | polycystic kidney and hepatic disease 1 (autosomal recessive)-like 1         |
| PPP1R3A | chr7:113516882-113559082    | protein phosphatase 1, regulatory (inhibitor) subunit 3A                     |
| PPP2R1A | chr19:52693191-52729670     | protein phosphatase 2, regulatory subunit A, alpha                           |
| PPP2R4  | chr9:131873244-131911223    | protein phosphatase 2A activator, regulatory subunit 4                       |
| PRDM1   | chr6:106534195-106557814    | PR domain containing 1, with ZNF domain                                      |
| PRSS1   | chr7:142457319-142460927    | protease, serine, 1 (trypsin 1)                                              |
| PTCH1   | chr9:98205266-98270831      | Homolog of Drosophila Patched gene 1                                         |
| PTEN    | chr10:89623195-89728531     | phosphatase and tensin homolog gene                                          |
| PTK2    | chr8:141668502-142011332    | PTK2 protein tyrosine kinase 2                                               |
| PTPN11  | chr12:112856536-112947716   | protein tyrosine phosphatase, non-receptor type 11                           |
| RAD51   | chr15:40987327-41024354     | RAD51 homolog                                                                |
| RAF1    | chr3:12625102-12705700      | v-raf-1 murine leukemia viral oncogene homolog 1                             |
| RB1     | chr13:48877883-49056024     | retinoblastoma gene                                                          |
| RELN    | chr7:103112233-103629963    | reelin                                                                       |
| RET     | chr10:43572517-43625795     | ret proto-oncogene                                                           |
| RIMS2   | chr8:104512976-105265451    | regulating synaptic membrane exocytosis 2                                    |
| RNF213  | chr17:78313726-78370078     | ring finger protein 213                                                      |
| RUNX1   | chr21:36160099-36421595     | runt-related transcription factor 1 (AML1)                                   |
| RUNX1T1 | chr8:92971152-93088365      | runt-related transcription factor 1                                          |
| RYR2    | chr1:237205702-237997288    | regulatory factor X, 2 (influences HLA class II expression)                  |
| SETD2   | chr3:47057900-47205467      | SET domain containing 2                                                      |
| SMAD4   | chr18:48556583-48611409     | SMAD family member 4                                                         |
| SMARCA4 | chr19:11071598-11172959     | SWI/SNF related, matrix assoc, actin dep reg of chrom, subfamily a, member 4 |
| SMARCB1 | chr22:24129150-24176704     | SWI/SNF related, matrix assoc, actin dep reg of chrom, subfamily b, member 1 |
| SMO     | chr7:128828713-128853383    | smoothed homolog (Drosophila)                                                |
| SOS1    | chr2:39208692-39347604      | son of sevenless homolog 1                                                   |
| SPEN    | chr1:16174359-16266950      | spen homolog, transcriptional regulator                                      |
| SPOP    | chr17:47676248-47755525     | speckle-type POZ protein                                                     |
| SPTA1   | chr1:158580496-158656506    | spectrin alpha, erythrocytic 1                                               |
| STK11   | chr19:1205798-1228434       | serine/threonine kinase 11 gene (LKB1)                                       |
| SYK     | chr9:93564012-93660833      | spleen tyrosine kinase                                                       |
| SYNE1   | chr6:152442823-152958534    | spectrin repeat containing, nuclear envelope 1                               |
| SYNE2   | chr14:64319683-64693165     | spectrin repeat containing, nuclear envelope 2                               |
| TBC1D4  | chr13:75858809-76056250     | TBC1 domain family, member 4                                                 |
| TET2    | chr4:106067943-106200958    | tet oncogene family member 2                                                 |
| TGFb1   | chr19:41836651-41859816     | transforming growth factor, beta 1                                           |
| TGFBR2  | chr3:30647994-30735631      | transforming growth factor, beta receptor II                                 |

|         |                          |                                                |
|---------|--------------------------|------------------------------------------------|
| TNFAIP3 | chr6:138188581-138204445 | tumor necrosis factor, alpha-induced protein 3 |
| TOP1    | chr20:39657462-39753124  | topoisomerase (DNA) I                          |
| TOP2A   | chr17:38544798-38574169  | topoisomerase II                               |
| TP53    | chr17:7571720-7590863    | tumor protein p53                              |
| TSC1    | chr9:135766735-135820020 | tuberous sclerosis 1                           |
| TSC2    | chr16:2097990-2138712    | tuberous sclerosis 2                           |
| TSHR    | chr14:81421869-81612646  | thyroid stimulating hormone receptor           |
| USH2A   | chr1:215796236-216596738 | usher syndrome 2A                              |
| VHL     | chr3:10183319-10193744   | von Hippel-Lindau syndrome gene                |
| WHSC1   | chr4:1873123-1983933     | Wolf-Hirschhorn syndrome candidate 1           |
| WT1     | chr11:32409325-32457087  | Wilms tumour 1 gene                            |
| ZNF238  | chr1:244214561-244220776 | zinc finger protein 238                        |
| ZNF536  | chr19:30863328-31048965  | zinc finger protein 536                        |

# Supplementary Figure 1

**a**

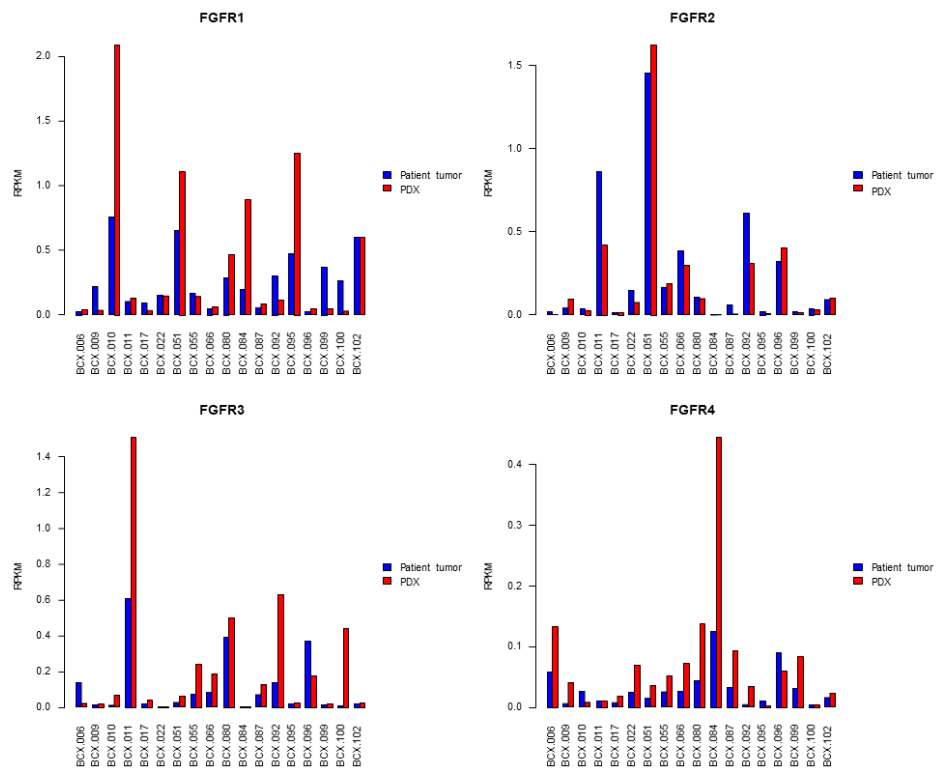

**b**

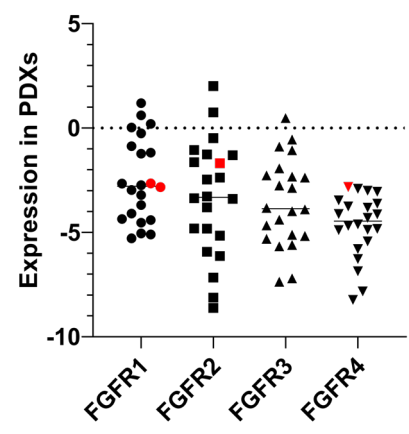

# Supplementary Figure 2

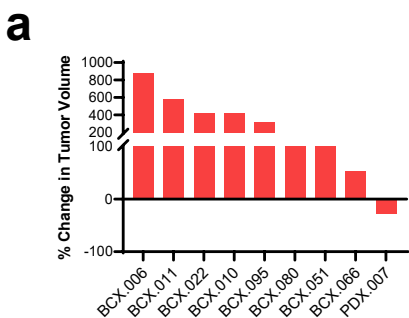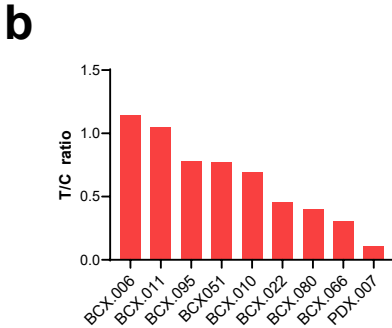

# Supplementary Figure 3

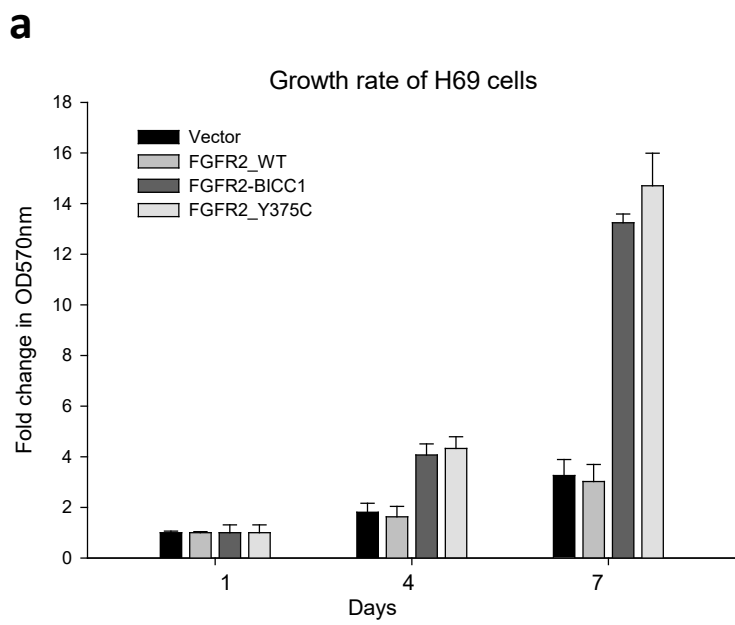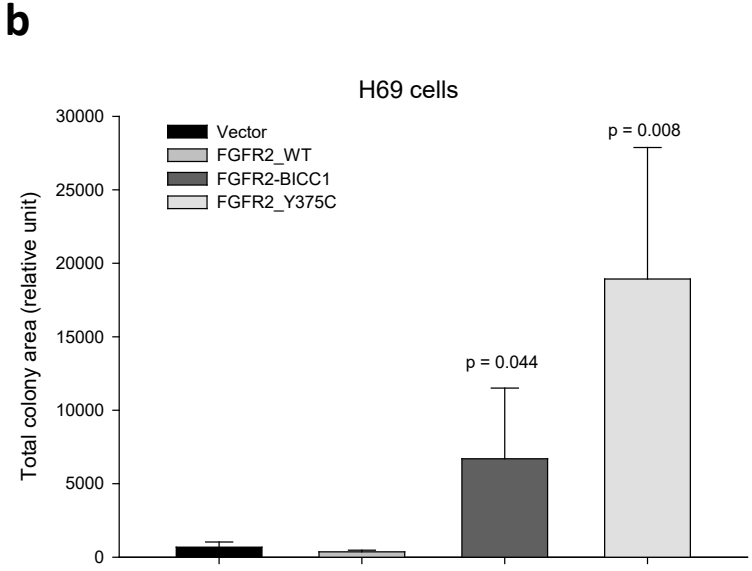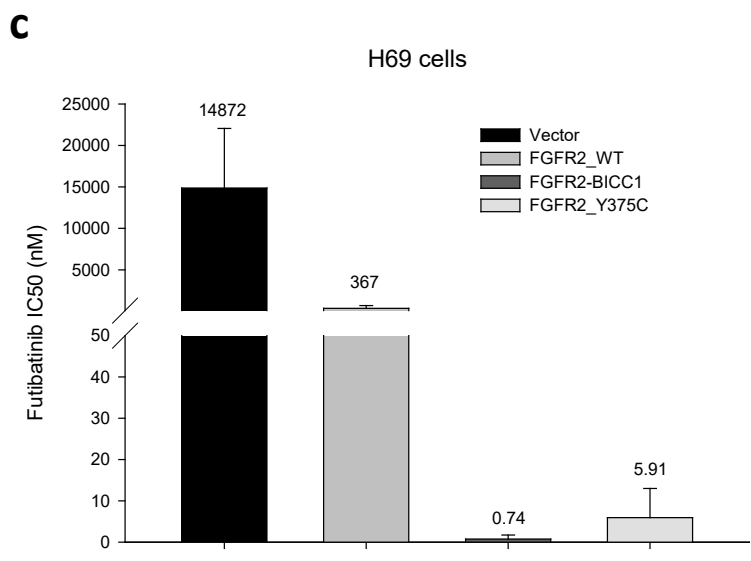

# Supplementary Figure 4

## PDX.007CL

**a**

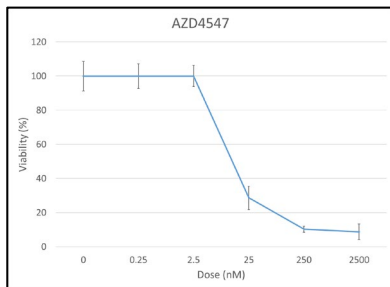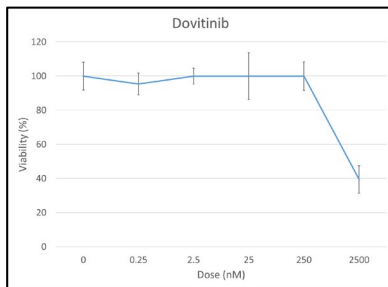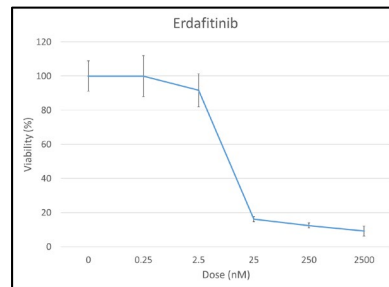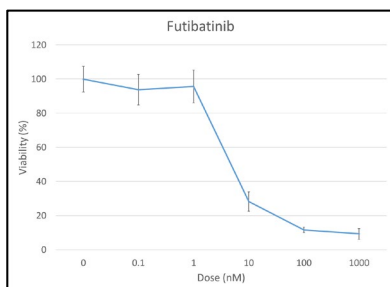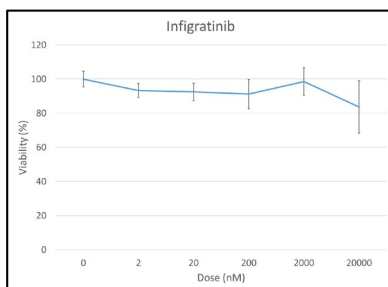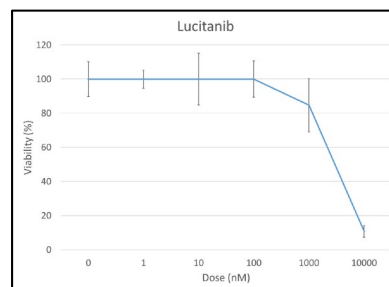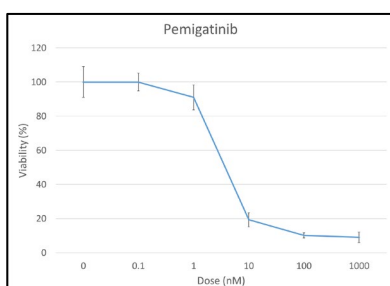

## MCF10A

**b**

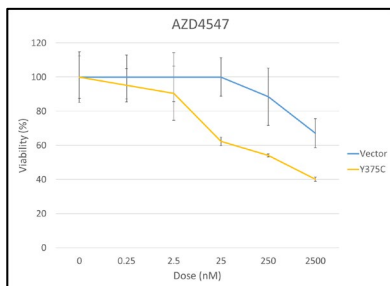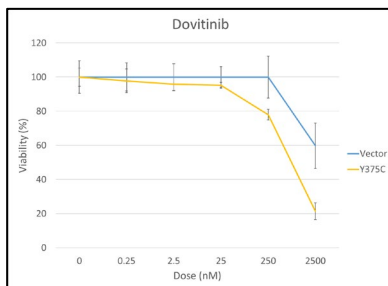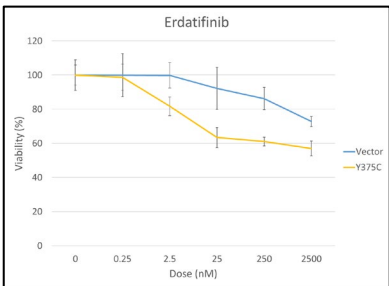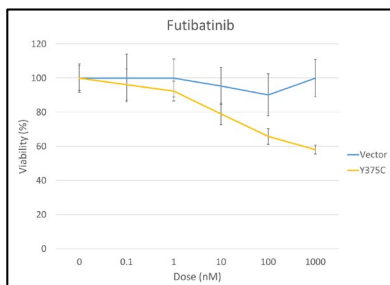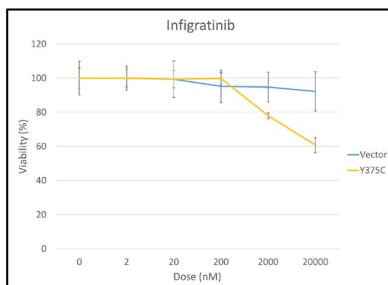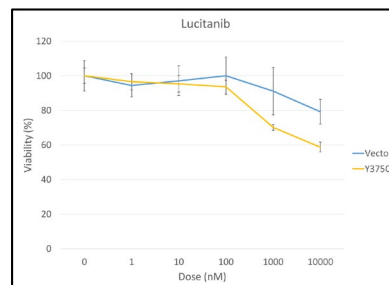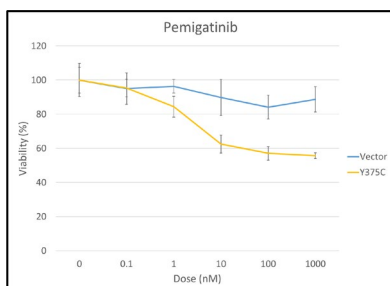



# Supplementary Figure 5

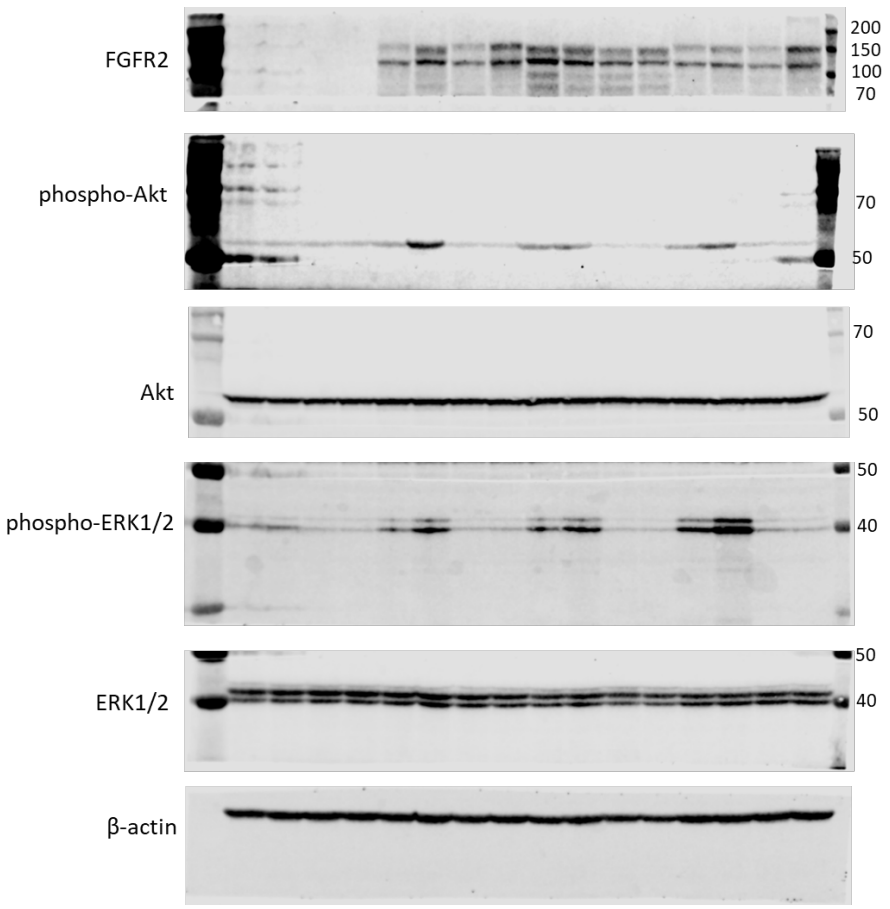

Supplement: 41598_2023_46586_MOESM1_ESM.pdf [file 41598_2023_46586_MOESM1_ESM.pdf]
